# Supplementary material for: Bone transport versus acute shortening for the management of infected tibial bone defects: a meta-analysis
Source: PubMed Central journal article supplement (PMC7006089; doi:10.1186/s12891-020-3114-y), 2020-02-06
Supplement: 12891_2020_3114_MOESM1_ESM.pdf [file 12891_2020_3114_MOESM1_ESM.pdf]

## Search term

**Search date limitation:through September 8, 2019**

### **Pubmed**

(bone transport[TIAB] OR bone transportation[TIAB] OR distraction osteogenesis[TIAB] OR ilizarov technique[TIAB]) AND (shortening[TIAB] OR acute compression[TIAB]) AND tibia\*[TIAB]

Records:115

### **Embase**

(‘bone transport’:ti,ab OR ‘bone transportation’:ti,ab OR ‘distraction osteogenesis’:ti,ab OR ‘ilizarov technique’:ti,ab) AND (shortening:ti,ab OR ‘acute compression’:ti,ab) AND tibia\*:ti,ab

Records:122
